# Supplementary material for: Identification and Functional Analysis of the fruitless Gene in a Hemimetabolous Insect, Nilaparvata lugens
Source: MDPI journal article supplement (doi:10.3390/insects15040262), 2024-04-11
Supplement: s1 [file s1]

Supplementary Materials:

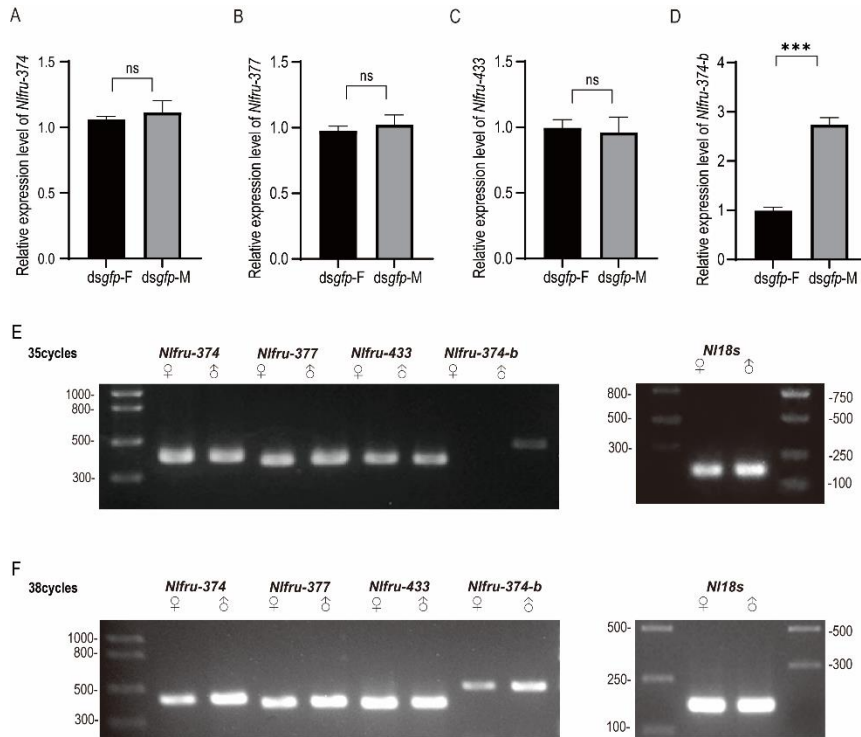

Figure. S1. The expression of different alternative spliceosomes in male and female insects. A, B, C, D) Expression levels of *Nlfu-374*, *Nlfu-377*, *Nlfu-433*, *Nlfu-374-b* in females and males. We did 3 replications of each experiment, each containing 10 BPHs. E, F) Sex-biased expression of four NIFRU splice variants. In RT-PCR, sex-specific cDNA was used as a template and specific primers were used for 35 and 38 cycles, respectively, to identify their respective 4 splice variants. Primer *Nl18s* RNA as a positive control.

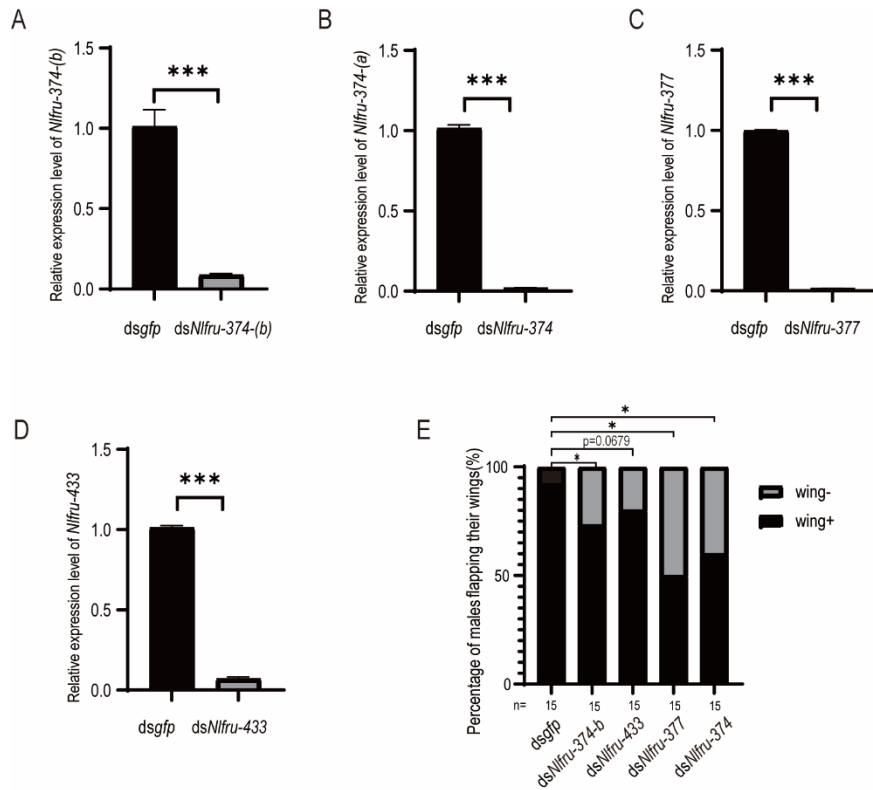

Figure. S2. Silencing efficiency of specific RNAi for different alternative spliceosomes and the proportion of males flapping their wings during courtship. A)-D) Expression of *Nlfu* after RNAi-specific selective spliceosome. We did 3 replications of each experiment, each containing 10 BPH. E) Proportion of males flapping their wings during courtship after RNAi on specific alternative spliceosomes, ds*Nlfu-374-b*, ds*Nlfu-377*, ds*Nlfu-374* had an obvious influence on the male's wing flapping during the mating behavior, and the p-value between ds*Nlfu-433*-treated males and dsGFP males was 0.0679. n represents the number of groups. (Student's t-test is used; \*\*,  $P < 0.01$ ; Chi-square test is used, \*,  $P < 0.01$ )

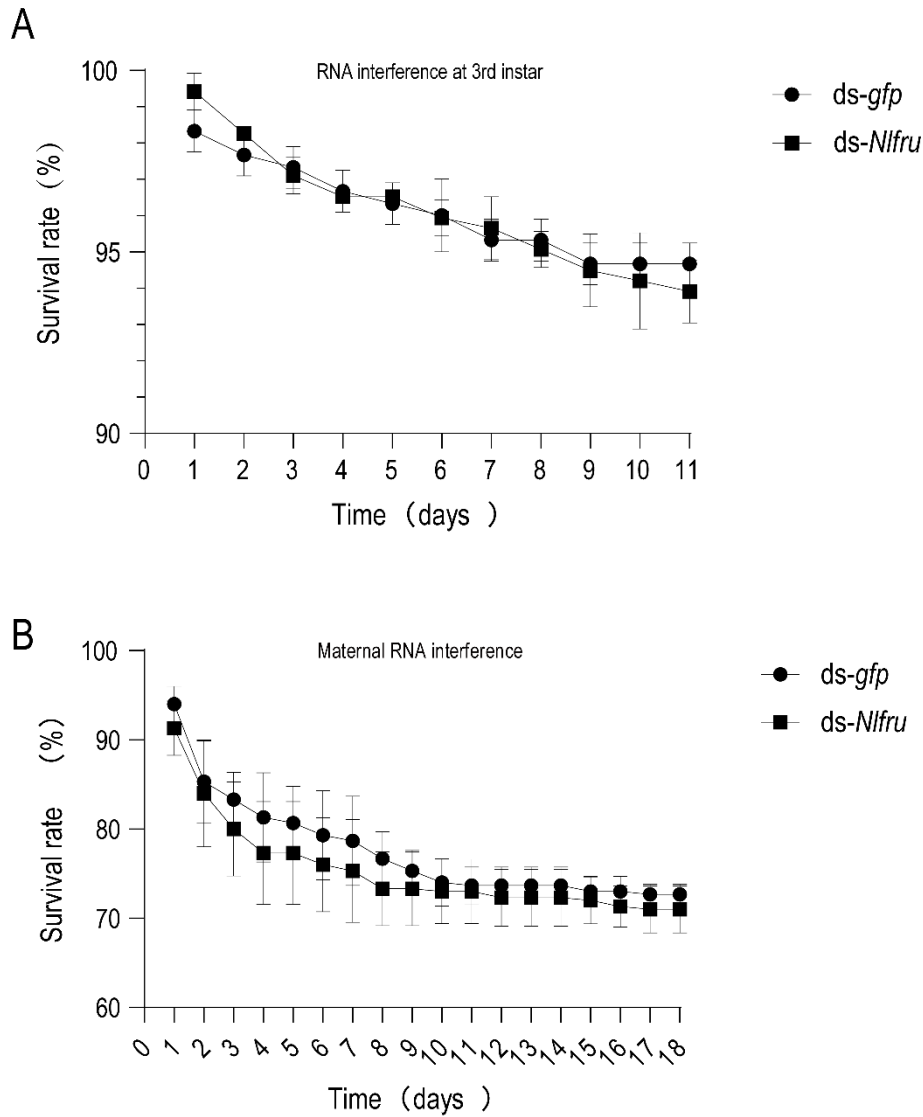

Figure S3 The survival rate of BPHs, which injected with dsNlfru in 3rd instar (A) and newly emerged females (0-1<sup>st</sup> hour) (B). Perform three replications for each group. n represents the number of BPH in each repetition. 3 replications were used in each experiment, and every replication contained 90 BPHs.

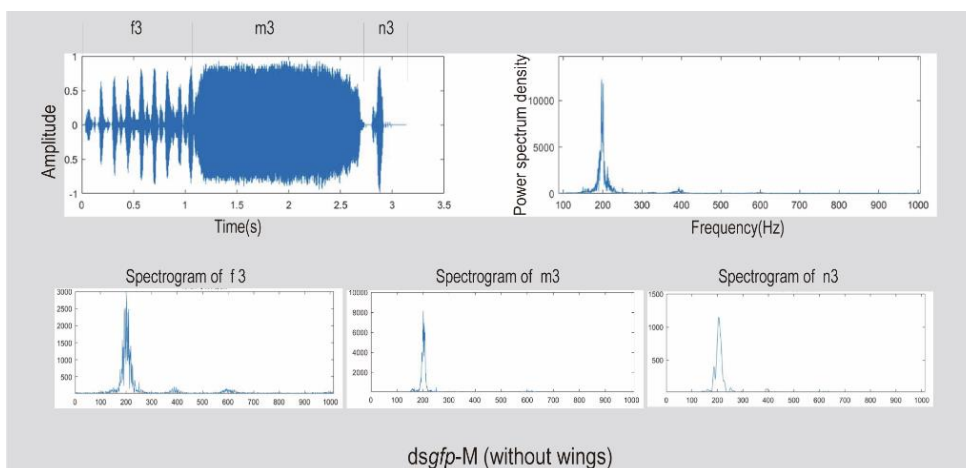

Figure S4. Spectra and spectra of courtship signals in wild-type wingless males.

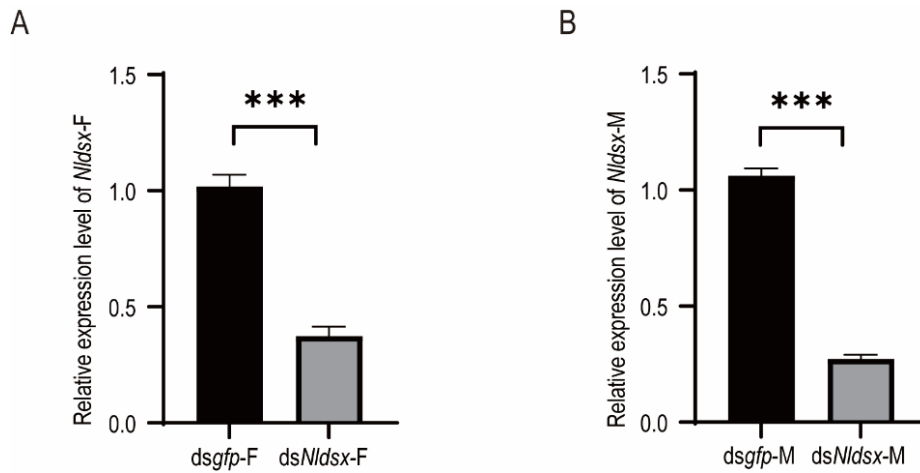

Figure. S5. Interference efficiency of ds*Nltsx*. A) Expression of *Nltsx* in female BPH after knockout of the *Nltsx* common segment. B) Expression of *Nltsx* in male BPH after knockout of the *Nltsx* common segment. We did 3 replications of each experiment, each containing 10 BPH.

Table S1. The main frequency of the courtship song.

| Sample             | #1 (Hz) | #2 (Hz) | #3 (Hz) | #4 (Hz) | #5 (Hz) | p-value     |
|--------------------|---------|---------|---------|---------|---------|-------------|
| WT-F               | 250     | 240     | 200     | 210     | 220     |             |
| ds <i>Nlfru</i> -F | 200     | 250     | 240     | 250     | 260     | 0.286144559 |
| WT-M               | 200     | 200     | 230     | 220     | 240     |             |
| ds <i>Nlfru</i> -M | 220     | 200     | 210     | 220     | 270     | 0.689723267 |

The main frequency of the courtship in each group was compared: the p-value of WT-F and ds*Nlfru*-F was 0.286144559, and the p-value of WT-M and ds*Nlfru*-M was 0.689723267. (Student's t-test is used.)

Table S2. The sequences of primers.

| Primer name                 | Sequence              |
|-----------------------------|-----------------------|
| <i>Nlfru</i> -374-b-F (499) | GGTGCTAACTAGGTTGCCG   |
| <i>Nlfru</i> -374-b-R (499) | CTGGGCAGAGAATGGTGGTC  |
| <i>Nlfru</i> -374-F (426)   | TGCCCTAAAGTGCCTAAACG  |
| <i>Nlfru</i> -374-R (426)   | GAGCTTAAGTAGACACCGACA |

---

|                            |                           |
|----------------------------|---------------------------|
| <i>Nlfru</i> -377-F (395)  | ATTTGAAAAATGACCAGATT      |
| <i>Nlfru</i> -377-R (395)  | ATGTCCAGCCAAAAATGCGG      |
| <i>Nlfru</i> -433-F (387)  | TTGCTCGTTTATCGCTTGCC      |
| <i>Nlfru</i> -433-R (387)  | TTTCGTGGCTTGACTTGTGC      |
| ds <i>Nlfru</i> -c-F       | T7+AGGACTAGCTGACTCGAGGAC  |
| ds <i>Nlfru</i> -c-R       | T7+ACTGTTTGCCCTTCGGACTC   |
| ds <i>Nlfru</i> -433-F     | T7+GCTCTCAGATCCAGCGCTAC   |
| ds <i>Nlfru</i> -433-R     | T7+TCAGGCACGAAACTGCCATA   |
| ds <i>Nlfru</i> -377-F     | T7+TCCAGCCAAACCCAAAGAGAT  |
| ds <i>Nlfru</i> -377-R     | T7+ATTGCCACAGTAGGGCATT    |
| ds <i>Nlfru</i> -374-F     | T7+GCACATGCGTCTGACATTG    |
| ds <i>Nlfru</i> -374-R     | T7+TTGCTTATCGGCTGAGGAGG   |
| ds <i>Nlfru</i> -374-b-F   | T7+ACCTTTTCAACATGGCTTGATT |
| ds <i>Nlfru</i> -374-b-R   | T7+CGGCAACCTAGTTTAGCACC   |
| ds <i>gfp</i> -F           | T7+CGCGCCGAGGTGAAGTTC     |
| ds <i>gfp</i> -R           | T7+GTTACCTTGATGCCGTT      |
| Q-NI18S-F                  | GTAACCCGCTGAACCTCCT       |
| Q-NI18S-R                  | TCCGAAGACCTCACTAAATC      |
| Q- <i>Nlfru</i> -c-F       | ACGGAGAAGTCAATGTCAAGCA    |
| Q- <i>Nlfru</i> -c-R       | TTTGTTTCGACTGAGGAGCGG     |
| Q- <i>Nlfru</i> -433-F     | CAGATGTCGAGTCCGAAGGG      |
| Q- <i>Nlfru</i> -433-R     | CGTAGCGCTGGATCTGAGAG      |
| Q- <i>Nlfru</i> -377-F     | TGGAAAATGACCAGATTTCGCAC   |
| Q- <i>Nlfru</i> -377-R     | CTGCTACGTACGGACTTGA       |
| Q- <i>Nlfru</i> -374-F     | ATGACCAGATTTCGACATGC      |
| Q- <i>Nlfru</i> -374-R     | TCGGACACACAAATCTGCCT      |
| Q- <i>Nlfru</i> -374-b-F   | TCATCATAGCAAGGAAA         |
| Q- <i>Nlfru</i> -374-b-R   | CTCAGCACATCAGTCAA         |
| Q-NI- <i>flightin</i> -F   | TGGATAAACGCAACAAAGG       |
| Q-NI- <i>flightin</i> -R   | GATGTAGTCAATCGGCATG       |
| ORF- <i>Nlfru</i> -374-b-F | TGCTAAACTAGGTGCCGGAT      |
| ORF- <i>Nlfru</i> -374-b-R | CCACCAGCGGGTTGATCAGTG     |
| ORF- <i>Nlfru</i> -374-a-F | CCGTTGCTCTCTCTCTCTAA      |
| ORF- <i>Nlfru</i> -374-a-R | CCAGCGGGTTGATCAGTGAAT     |
| ORF- <i>Nlfru</i> -377-F   | AAGGGACCGTTGCTCTCTCC      |
| ORF- <i>Nlfru</i> -377-R   | GGACAGAAAGCGGTATTGC       |
| ORF- <i>Nlfru</i> -433-F   | ACCGTTGCTCTCTCTCTCTAA     |
| ORF- <i>Nlfru</i> -433-R   | TGCTAGGTAGGAGGCAGGTAG     |

---
